# Supplementary material for: A Study on the Antimicrobial and Antibiofilm Peptide 1018-K6 as Potential Alternative to Antibiotics against Food-Pathogen Salmonella enterica
Source: MDPI journal article supplement (doi:10.3390/foods10061372), 2021-06-14
Supplement: s1 [file s1]

**Table S1.** Source of *Salmonella enterica* strains and scheduled tests.

| <i>Salmonella</i> subspecies and serovar       | Source                                   | MIC | MBC | BIC |
|------------------------------------------------|------------------------------------------|-----|-----|-----|
| <i>S. Enteritidis</i> CECT 4300                | CECT                                     | ✓   | ✓   | ✓   |
| <i>S. Typhimurium</i> CECT 4594                | CECT                                     | ✓   | ✓   | ✓   |
| <i>S. Agama</i>                                | Spanish NRL for Salmonellosis in animals | ✓   | ✓   |     |
| <i>S. Dublin</i>                               | Spanish NRL for Salmonellosis in animals | ✓   | ✓   | ✓   |
| <i>S. Eboko</i>                                | Spanish NRL for Salmonellosis in animals | ✓   | ✓   |     |
| <i>S. Hadar</i>                                | Spanish NRL for Salmonellosis in animals | ✓   | ✓   | ✓   |
| <i>S. Infantis</i>                             | Spanish NRL for Salmonellosis in animals | ✓   | ✓   | ✓   |
| <i>S. Jerusalem</i>                            | Spanish NRL for Salmonellosis in animals | ✓   | ✓   |     |
| <i>S. Meleagridis</i>                          | Spanish NRL for Salmonellosis in animals | ✓   | ✓   | ✓   |
| <i>S. Poona</i>                                | Spanish NRL for Salmonellosis in animals | ✓   | ✓   |     |
| <i>S. Richmond</i>                             | Spanish NRL for Salmonellosis in animals | ✓   | ✓   |     |
| <i>S. Virchow</i>                              | Spanish NRL for Salmonellosis in animals | ✓   | ✓   | ✓   |
| <i>S. Anatum</i>                               | Bovine faeces                            | ✓   | ✓   |     |
| <i>S. Bardo</i>                                | Chicken faeces                           | ✓   | ✓   |     |
| <i>S. Bredeney</i>                             | Chicken faeces                           | ✓   | ✓   |     |
| <i>S. Dabou</i>                                | Chicken faeces                           | ✓   | ✓   |     |
| <i>S. Drac</i>                                 | Chicken faeces                           | ✓   | ✓   |     |
| <i>S. Enteritidis</i>                          | Chicken faeces                           | ✓   | ✓   | ✓   |
| <i>S. Isangi</i>                               | Chicken faeces                           | ✓   | ✓   |     |
| <i>S. Mbandaka</i>                             | Chicken faeces                           | ✓   | ✓   |     |
| <i>S. Mikawasima</i>                           | Chicken faeces                           | ✓   | ✓   |     |
| <i>S. Montevideo</i>                           | Chicken faeces                           | ✓   | ✓   |     |
| <i>S. Ndolo</i>                                | Chicken faeces                           | ✓   | ✓   |     |
| <i>S. Newport</i>                              | Chicken faeces                           | ✓   | ✓   |     |
| <i>S. Seftenberg</i>                           | Chicken faeces                           | ✓   | ✓   |     |
| <i>S. Stanleyville</i>                         | Chicken faeces                           | ✓   | ✓   |     |
| <i>S. Thompson</i>                             | Chicken faeces                           | ✓   | ✓   |     |
| <i>S. Typhimurium</i>                          | Chicken faeces                           | ✓   | ✓   | ✓   |
| <i>S. Typhimurium</i> 1                        | Chicken faeces                           | ✓   | ✓   |     |
| <i>S. Typhimurium</i> 2                        | Chicken faeces                           | ✓   | ✓   |     |
| <i>S. Typhimurium</i> 3                        | Chicken faeces                           | ✓   | ✓   |     |
| <i>S. Typhimurium</i> 4                        | Chicken faeces                           | ✓   | ✓   |     |
| <i>S. Typhimurium</i> 5                        | Chicken faeces                           | ✓   | ✓   |     |
| <i>S. Typhimurium</i> 6                        | Chicken faeces                           | ✓   | ✓   |     |
| <i>S. Typhimurium</i> 7                        | Chicken faeces                           | ✓   | ✓   |     |
| <i>S. Typhimurium</i> 8                        | Chicken faeces                           | ✓   | ✓   |     |
| <i>S. arizonae</i> , serotype 48: z4, z23      | Chicken faeces                           | ✓   | ✓   |     |
| <i>S. arizonae</i> , serotype 48: z4, z23, z32 | Chicken faeces                           | ✓   | ✓   |     |
| <i>S. salamae</i> , serotype 4, 12:b-          | Chicken faeces                           | ✓   | ✓   |     |
| <i>S. salamae</i> , serotype 6, 8:g, m, t      | Chicken faeces                           | ✓   | ✓   | ✓   |
| <i>S. Cerro</i>                                | Fish                                     | ✓   | ✓   |     |
| <i>S. Typhimurium</i> monofasica               | Straw (cattle feed)                      | ✓   | ✓   | ✓   |

**Table S2.**  $\Delta OD_{630nm}$  values (averaged of four independent replicates) of microbial biofilms produced by *Salmonella enterica* strains. Values are means  $\pm$  standard error (ES).

| Salmonella serotypes |          |          |                  |        | Biofilm formation                     |                                       |          |
|----------------------|----------|----------|------------------|--------|---------------------------------------|---------------------------------------|----------|
|                      |          |          |                  |        | Inoculum<br>10 <sup>8</sup> CFU/mL    | Inoculum<br>10 <sup>4</sup> CFU/mL    |          |
| Genus                | Species  | Subsp.   | Serovar          | Source | Average<br>OD <sub>630</sub> $\pm$ ES | Average<br>OD <sub>630</sub> $\pm$ ES | <i>p</i> |
| Salmonella           | enterica | enterica | Enteritidis 4300 | CECT   | 0.092 $\pm$ 0.007                     | 0.107 $\pm$ 0.007                     | 0.008    |
| Salmonella           | enterica | enterica | Enteritidis      | wild   | 0.083 $\pm$ 0.004                     | 0.073 $\pm$ 0.004                     | 0.002    |
| Salmonella           | enterica | enterica | Typhimurium 4594 | CECT   | 0.071 $\pm$ 0.004                     | 0.058 $\pm$ 0.004                     | 7.47E-08 |
| Salmonella           | enterica | enterica | Typhimurium      | wild   | 0.112 $\pm$ 0.009                     | 0.111 $\pm$ 0.007                     | 0.829    |
| Salmonella           | enterica | enterica | T. monofasica    | wild   | 0.075 $\pm$ 0.006                     | 0.074 $\pm$ 0.006                     | 0.722    |
| Salmonella           | enterica | enterica | Infantis         | NRL    | 0.083 $\pm$ 0.017                     | 0.136 $\pm$ 0.02                      | 0.001    |
| Salmonella           | enterica | enterica | Meleagridis      | NRL    | 0.135 $\pm$ 0.019                     | 0.11 $\pm$ 0.017                      | 0.028    |
| Salmonella           | enterica | enterica | Virchow          | NRL    | 0.094 $\pm$ 0.009                     | 0.097 $\pm$ 0.008                     | 0.574    |
| Salmonella           | enterica | enterica | Dublin           | NRL    | 0.045 $\pm$ 0.002                     | 0.048 $\pm$ 0.002                     | 0.115    |
| Salmonella           | enterica | enterica | Hadar            | NRL    | 0.047 $\pm$ 0.003                     | 0.048 $\pm$ 0.003                     | 0.584    |
| Salmonella           | enterica | salamae  | 6, 8: g, m, t    | wild   | 0.081 $\pm$ 0.006                     | 0.075 $\pm$ 0.005                     | 0.169    |

Statistical analysis was performed only within each strain, comparing controls of different inoculum concentration.
